# Supplementary material for: Photodegradation Process of Organic Dyes in the Presence of a Manganese-Doped Zinc Sulfide Nanowire Photocatalyst
Source: MDPI journal article supplement (doi:10.3390/ma14195840), 2021-10-06
Supplement: s1 [file s1]

## Supplementary Materials

# Photodegradation Process of Organic Dyes in The Presence of a Manganese Doped Zinc Sulfide Nanowire Photocatalyst

Adam Żaba, Svitlana Sovinska, Tetiana Kirish, Adam Węgrzynowicz and Katarzyna Matras-Postolek \*

Faculty of Chemical Engineering and Technology, Cracow University of Technology, Warszawska 24, 31-155 Cracow, Poland; adam.p.zaba@gmail.com (A.Ż.), svtlanastorm@mail.ru (S.S.), tanyakirish@gmail.com (T.K.), adam.wegrzynowicz@pk.edu.pl (A.W.)

\* Correspondence: k.matras@pk.edu.pl; Tel.: + 48 126283059

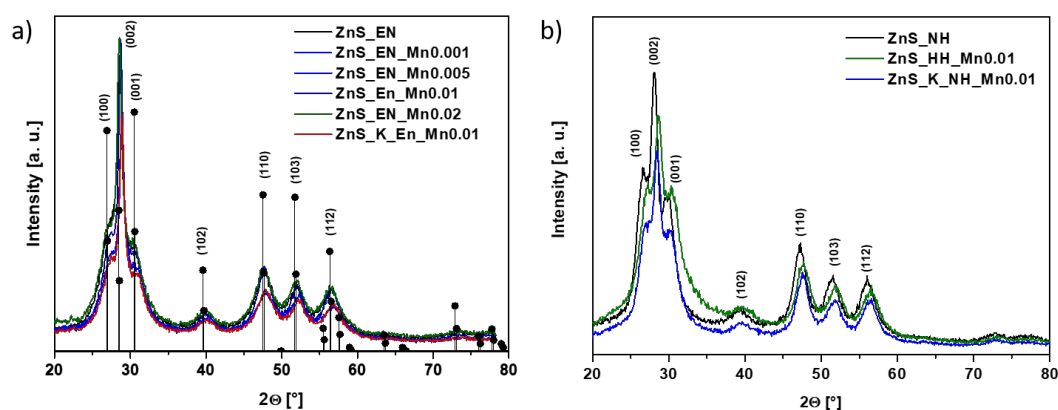

**Figure S1.** XRD patterns (a) of ZnS nanocrystals stabilized with ethylenediamine and (b) ZnS nanocrystals stabilized with hydrazine; the peaks in the pattern matching well with wurtzite structure according to JCPDS#96-110-0045.

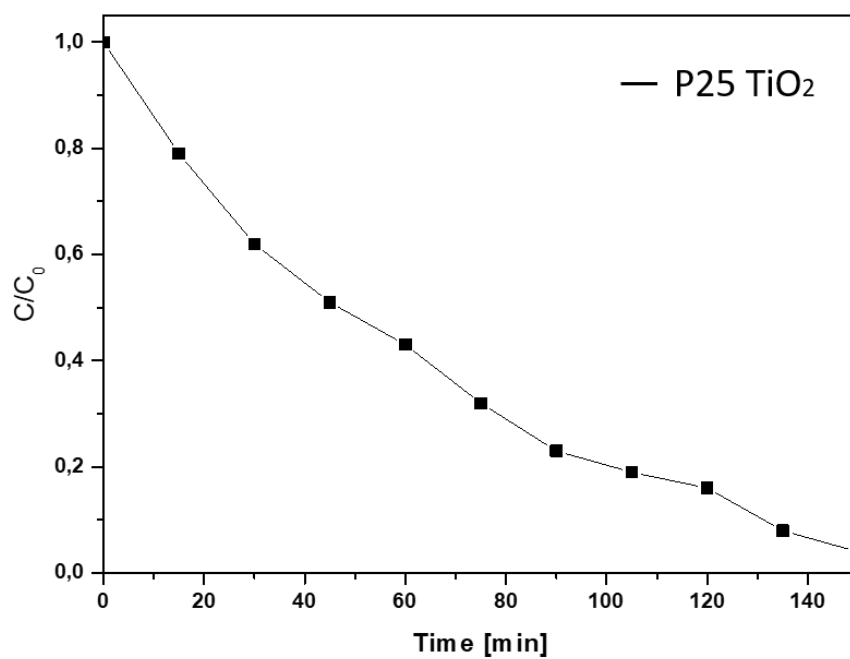

**Figure S2.** Time-dependent UV-Vis absorption spectra for RhB observed during incubation with the P25 TiO<sub>2</sub> samples under UV illumination.
